# Supplementary material for: Racial and Ethnic Disparities in Years of Potential Life Lost Attributable to COVID-19 in the United States: An Analysis of 45 States and the District of Columbia
Source: bioRxiv or medRxiv preprint supplement (doi:10.1101/2021.01.28.21249411), 2021-01-31
Supplement: Supplementary file [file media-5.pdf]

| State | NH White             | NH Black           | Hispanic           | NH Asian           | NH AIAN          |
|-------|----------------------|--------------------|--------------------|--------------------|------------------|
| US    | [177,636 -- 179,096] | [51,054 -- 52,514] | [56,097 -- 57,557] | [10,725 -- 12,185] | [3,318 -- 4,778] |
| AL    | [3,427 -- 3,470]     | [1,654 -- 1,689]   | [103 -- 152]       | [6 -- 55]          | [4 -- 53]        |
| AZ    | [3,283 -- 3,410]     | [209 -- 344]       | [2,270 -- 2,389]   | [105 -- 240]       | [884 -- 1,019]   |
| AR    | [2,440 -- 2,456]     | [441 -- 449]       | [129 -- 145]       | [5 -- 45]          | [4 -- 36]        |
| CA    | [6,865 -- 6,909]     | [1,471 -- 1,531]   | [10,418 -- 10,478] | [2,519 -- 2,579]   | [81 -- 149]      |
| CO    | [2,472 -- 2,532]     | [191 -- 243]       | [989 -- 1,041]     | [132 -- 192]       | [29 -- 105]      |
| CT    | [3,738 -- 3,797]     | [731 -- 790]       | [483 -- 542]       | [62 -- 121]        | [2 -- 61]        |
| DE    | [499 -- 523]         | [167 -- 191]       | [17 -- 41]         | [3 -- 27]          | [3 -- 27]        |
| DC    | [105 -- 121]         | [610 -- 626]       | [123 -- 147]       | [6 -- 34]          | [1 -- 9]         |
| FL    | [10,182 -- 10,207]   | [3,641 -- 3,658]   | [5,188 -- 5,213]   | [265 -- 298]       | [7 -- 54]        |
| GA    | [4,561 -- 4,586]     | [3,239 -- 3,264]   | [541 -- 574]       | [128 -- 168]       | [3 -- 36]        |
| ID    | [1,012 -- 1,045]     | [3 -- 36]          | [129 -- 154]       | [5 -- 41]          | [5 -- 41]        |
| IL    | [8,327 -- 8,426]     | [2,585 -- 2,668]   | [2,415 -- 2,506]   | [510 -- 609]       | [4 -- 103]       |
| IN    | [6,154 -- 6,187]     | [850 -- 875]       | [289 -- 306]       | [54 -- 87]         | [3 -- 36]        |
| IA    | [3,588 -- 3,604]     | [101 -- 125]       | [117 -- 133]       | [46 -- 70]         | [6 -- 54]        |
| KS    | [2,062 -- 2,123]     | [163 -- 232]       | [228 -- 289]       | [17 -- 89]         | [17 -- 89]       |
| KY    | [2,635 -- 2,660]     | [317 -- 342]       | [69 -- 94]         | [6 -- 39]          | [2 -- 27]        |
| LA    | [3,179 -- 3,223]     | [2,612 -- 2,670]   | [159 -- 217]       | [23 -- 81]         | [5 -- 63]        |
| MD    | [2,688 -- 2,726]     | [2,162 -- 2,200]   | [579 -- 617]       | [205 -- 243]       | [4 -- 42]        |
| MA    | [7,421 -- 7,533]     | [757 -- 869]       | [660 -- 772]       | [285 -- 397]       | [4 -- 123]       |
| MI    | [6,725 -- 6,842]     | [2,808 -- 2,933]   | [323 -- 448]       | [82 -- 223]        | [32 -- 173]      |
| MN    | [4,113 -- 4,156]     | [255 -- 298]       | [142 -- 192]       | [173 -- 216]       | [45 -- 95]       |
| MS    | [2,281 -- 2,307]     | [1,817 -- 1,851]   | [22 -- 63]         | [16 -- 57]         | [86 -- 127]      |
| MO    | [5,142 -- 5,184]     | [794 -- 828]       | [137 -- 163]       | [55 -- 97]         | [5 -- 63]        |
| MT    | [716 -- 732]         | [4 -- 25]          | [15 -- 36]         | [4 -- 25]          | [185 -- 201]     |
| NE    | [1,533 -- 1,575]     | [66 -- 110]        | [147 -- 191]       | [5 -- 49]          | [5 -- 49]        |
| NV    | [1,173 -- 1,197]     | [272 -- 288]       | [725 -- 733]       | [290 -- 298]       | [16 -- 64]       |
| NH    | [598 -- 628]         | [5 -- 35]          | [4 -- 34]          | [4 -- 34]          | [0 -- 9]         |
| NJ    | [9,060 -- 9,077]     | [2,843 -- 2,860]   | [3,456 -- 3,481]   | [985 -- 1,016]     | [6 -- 37]        |
| NM    | [513 -- 544]         | [6 -- 37]          | [642 -- 659]       | [4 -- 35]          | [640 -- 657]     |
| NY    | [15,459 -- 16,449]   | [8,147 -- 9,113]   | [8,581 -- 9,531]   | [2,631 -- 3,597]   | [20 -- 1,010]    |
| NC    | [1,964 -- 1,999]     | [1,045 -- 1,072]   | [289 -- 328]       | [45 -- 84]         | [26 -- 65]       |
| ND    | [981 -- 1,029]       | [3 -- 51]          | [7 -- 55]          | [3 -- 51]          | [70 -- 118]      |
| OH    | [7,526 -- 7,543]     | [1,242 -- 1,275]   | [144 -- 169]       | [86 -- 119]        | [4 -- 38]        |
| OK    | [2,035 -- 2,067]     | [162 -- 178]       | [162 -- 186]       | [24 -- 56]         | [287 -- 295]     |
| OR    | [841 -- 867]         | [7 -- 52]          | [158 -- 184]       | [43 -- 77]         | [6 -- 51]        |
| PA    | [11,049 -- 11,102]   | [2,127 -- 2,180]   | [658 -- 711]       | [288 -- 341]       | [3 -- 56]        |
| RI    | [1,172 -- 1,197]     | [81 -- 114]        | [115 -- 152]       | [7 -- 44]          | [2 -- 27]        |
| SC    | [2,749 -- 2,774]     | [1,675 -- 1,700]   | [117 -- 142]       | [15 -- 64]         | [4 -- 45]        |
| SD    | [1,140 -- 1,156]     | [4 -- 36]          | [8 -- 42]          | [6 -- 40]          | [142 -- 166]     |
| TN    | [4,505 -- 4,539]     | [1,138 -- 1,164]   | [200 -- 234]       | [28 -- 62]         | [3 -- 37]        |
| TX    | [9,682 -- 9,760]     | [2,699 -- 2,777]   | [13,441 -- 13,519] | [486 -- 557]       | [41 -- 119]      |
| UT    | [901 -- 917]         | [5 -- 45]          | [205 -- 229]       | [27 -- 59]         | [36 -- 76]       |
| VA    | [3,001 -- 3,040]     | [1,236 -- 1,275]   | [410 -- 449]       | [182 -- 221]       | [4 -- 43]        |
| WA    | [2,120 -- 2,165]     | [89 -- 134]        | [404 -- 447]       | [203 -- 248]       | [74 -- 117]      |
| WV    | [738 -- 755]         | [18 -- 35]         | [2 -- 19]          | [2 -- 19]          | [2 -- 19]        |
| WI    | [4,297 -- 4,321]     | [342 -- 374]       | [290 -- 306]       | [76 -- 92]         | [57 -- 89]       |

**Table S2:** Intervals denoting the entire plausible range of total COVID-19 deaths for NH Whites, NH Blacks, Hispanics, NH Asians, and NH AIAN's in the U.S. and each examined state with respect to cumulative COVID-19 deaths according to data from the National Center for Health Statistics as of December 30, 2020.
